# Supplementary material for: Technical Complications during Veno-Venous Extracorporeal Membrane Oxygenation and Their Relevance Predicting a System-Exchange – Retrospective Analysis of 265 Cases
Source: PubMed Central journal article supplement (PMC4251903; doi:10.1371/journal.pone.0112316), 2014-12-02

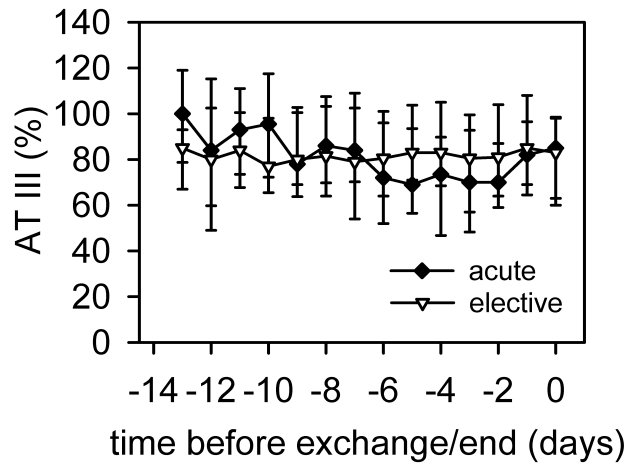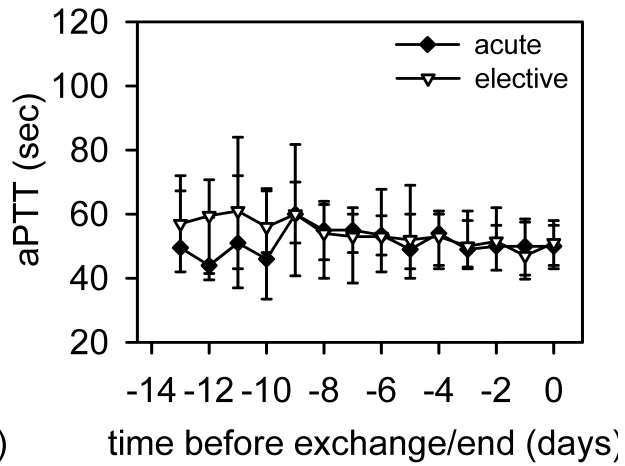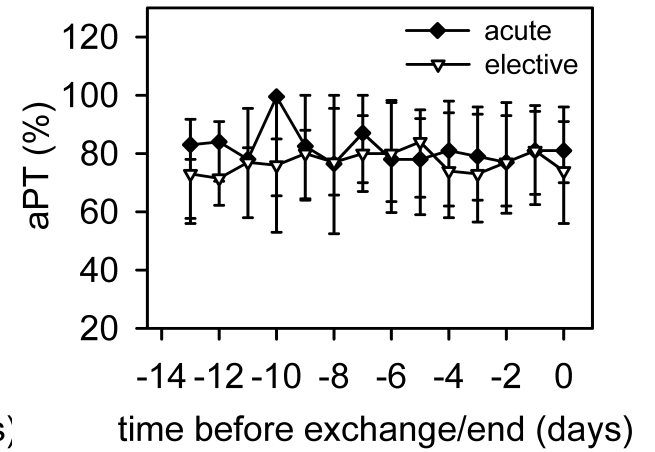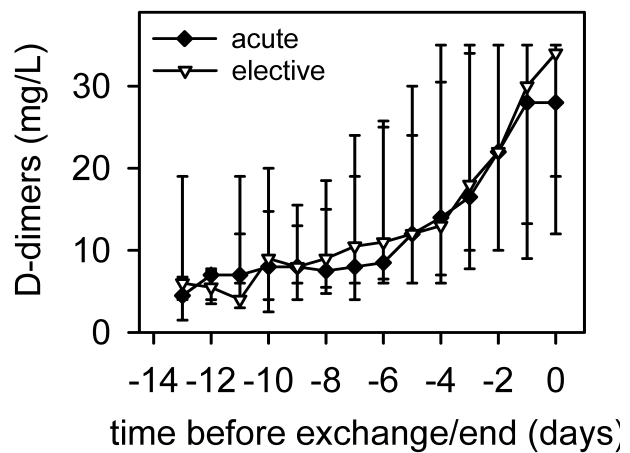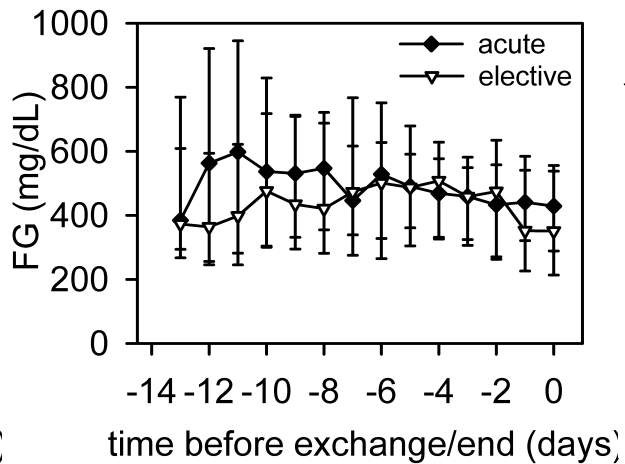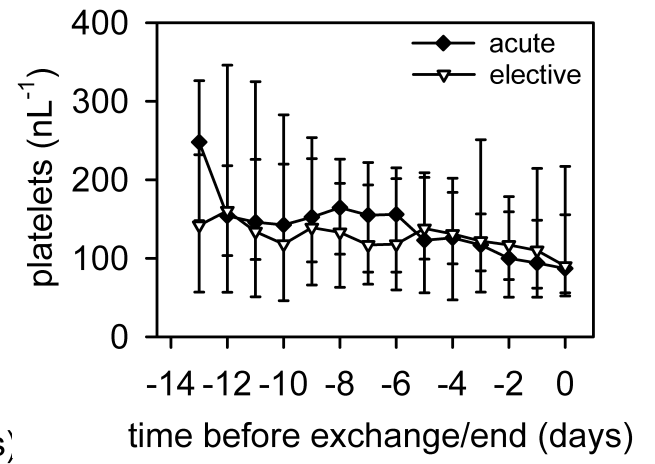

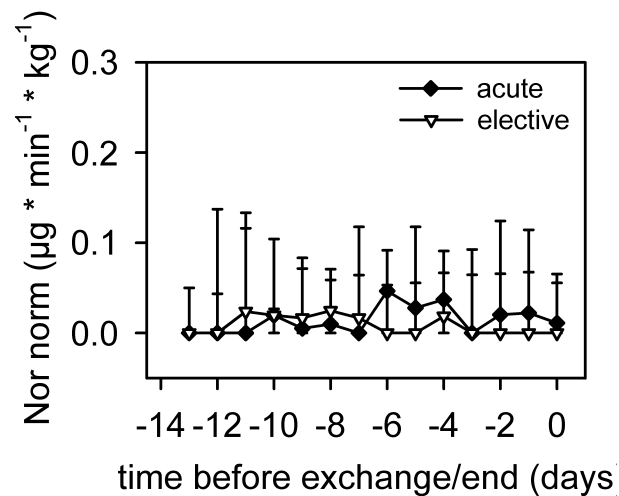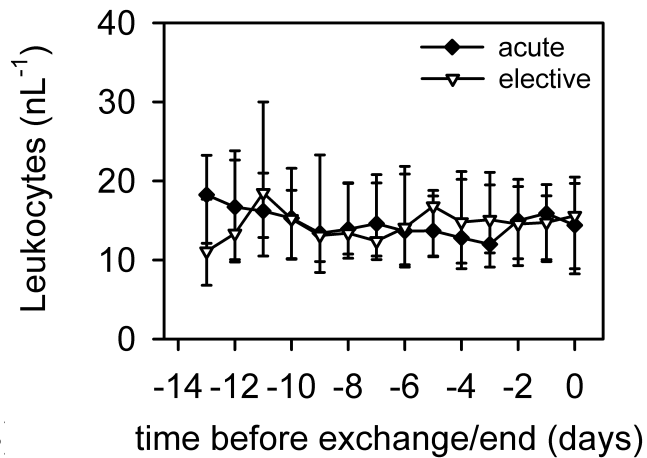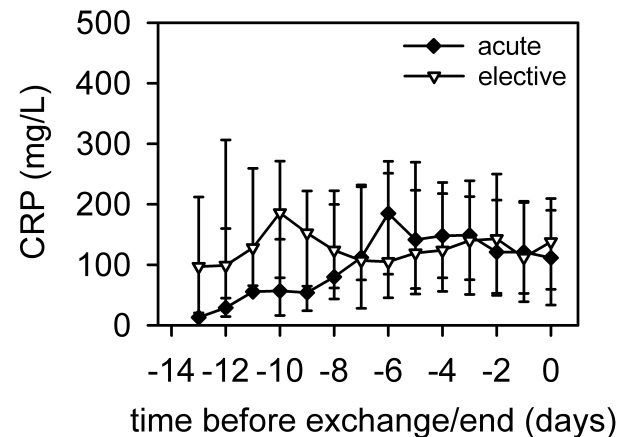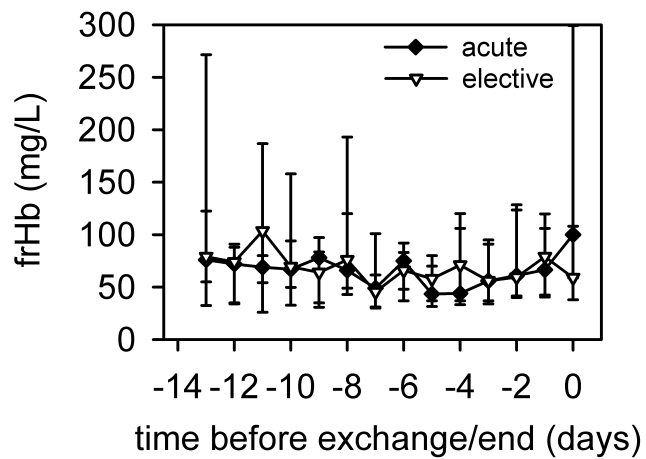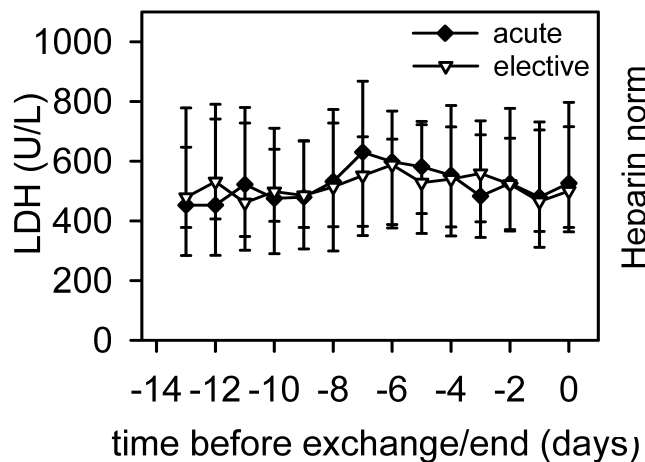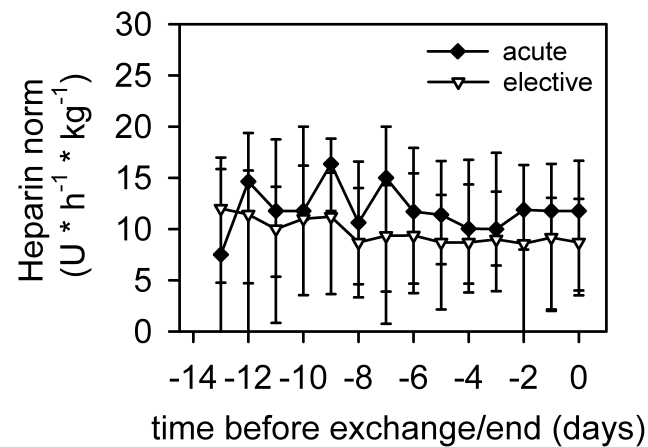

Supplement: pone.0112316.s002.pdf [file pone.0112316.s002.pdf]
